# Supplementary material for: Reduction of haloacetonitrile-associated risk by adjustment of distribution system pH
Source: Royal Society of Chemistry journal article supplement (doi:10.1039/d3ew00230f), 2023-01-01
Supplement: d3ew00230f1.pdf [file d3ew00230f1.pdf]

## **Supplemental Information**

### **Reduction of Haloacetonitrile-associated Risk by Adjustment of Distribution System pH**

Kevin Stewart<sup>1,2</sup>, Dong An<sup>3,4</sup>, and David Hanigan<sup>1</sup>

<sup>1</sup>Department of Civil and Environmental Engineering, University of Nevada, Reno, NV 89557-0258, United States

<sup>2</sup>Now with Keller Associates, Reno, NV 89502

<sup>3</sup>Department of Environmental Science & Engineering, Fudan University, Shanghai 200238, China

<sup>4</sup>Shanghai Institute of Pollution Control and Ecological Security, Shanghai 200092, China

### **SI Table of Contents**

|             |    |
|-------------|----|
| Text SI-1   | 2  |
| Text SI-2   | 2  |
| Table SI-1  | 3  |
| Table SI-2  | 4  |
| Figure SI-1 | 5  |
| Figure SI-2 | 6  |
| Table SI-3  | 7  |
| Table SI-4  | 8  |
| Table SI-5  | 9  |
| Table SI-6  | 10 |
| Figure SI-3 | 11 |
| Figure SI-4 | 12 |
| Figure SI-5 | 13 |
| Figure SI-6 | 14 |

Text SI-1: Trihalomethane, Haloacetamide, and Haloacetonitrile GC-ECD Method Parameters:

1. Inlet:  
200°C  
Split Mode – Split Ratio 10:1, Split Flow 9 mL/min  
Gas Saver: On – 20 mL/min after 3 min
2. Column: HP-5, 30 m x 320 µm x 0.25 µm  
Flow: 0.9 mL/min He  
Avg Velocity: 16.647 cm/sec  
Constant Flow  
Post Run: 2.3922 mL/min
3. Oven:  
Equilibration Time: 0.5 min  
Max Oven Temp: 325°C  
Oven Program:  
Initial 35°C, Hold 9 min  
Ramp to 40°C at 1°C/min and hold for 3 min  
Ramp to 120°C at 6°C/min and hold for 3 min  
Ramp to 250°C at 30°C/min and hold for 3 min
4. Detector:  
ECD, 290°C  
Makeup flow 25 mL/min N<sub>2</sub>  
Constant Makeup Flow

Text SI-2: Haloacetic Acid GC-ECD Method Parameters:

1. Inlet:  
175°C  
Split Mode – Splitless, Pure Flow to Split Vent: 30 mL/min at 0.75 min  
Gas Saver: On – 20 mL/min after 3 min
2. Column: DB-1, 30 m x 250 µm x 1 µm  
Flow: 1.6 mL/min He  
Avg Velocity: 35.053 cm/sec  
Constant Flow  
Post Run: 2.3922 mL/min
3. Oven:  
Equilibration Time: 0.5 min  
Max Oven Temp: 325°C  
Oven Program:  
Initial 35°C, Hold 10 min

- Ramp to 40°C at 1°C/min and hold for 5 min  
 Ramp to 110°C at 2.5°C/min and hold for 3 min  
 Ramp to 220°C at 20°C/min and hold for 2 min
4. Detector:  
 ECD, 300°C  
 Makeup flow 25 mL/min N<sub>2</sub>  
 Constant Makeup Flow

Table SI-1: Water quality parameters for finished drinking water.

|                                            |       |
|--------------------------------------------|-------|
| NTU                                        | 0.02  |
| TSS (mg/L)                                 | BDL   |
| pH                                         | 7.9   |
| Alkalinity (mg/L as CaCO <sub>3</sub> )    | 59.3  |
| TOC (mg/L)                                 | 1.61  |
| ORP (mV)                                   | 618   |
| FCl <sub>2</sub> (mg/L Cl <sub>2</sub> )   | 1.72  |
| TCl <sub>2</sub> (mg/L Cl <sub>2</sub> )   | 1.8   |
| NH <sub>2</sub> Cl (mg/L Cl <sub>2</sub> ) | BDL   |
| NH <sub>3</sub> (mg/L N)                   | BDL   |
| NO <sub>2</sub> <sup>-</sup> (mg/L N)*     | BDL   |
| NO <sub>3</sub> <sup>-</sup> (mg/L N)*     | 0.764 |
| Br <sup>-</sup> (mg/L)*                    | BDL   |
| Chloride (mg/L)*                           | 20.48 |
| Sulfate (mg/L)*                            | 6.60  |
| TN (mg/L)                                  | 0.157 |

\*NO<sub>2</sub><sup>-</sup>, NO<sub>3</sub><sup>-</sup>, bromide, chloride, and sulfate were measured using ion chromatography. The method detection limit is ~5 µg/L for each.

Table SI-2: CHO LC<sub>50</sub> values for compounds of interest

| <b>Haloacetonitriles</b> |                        |
|--------------------------|------------------------|
| <b>Compound</b>          | <b>LC<sub>50</sub></b> |
| TCAN                     | 1.60E-04               |
| DCAN                     | 5.73E-05               |
| DBAN                     | 2.85E-06               |
| BCAN                     | 8.46E-06               |
| CAN                      | 6.83E-05               |
| BAN                      | 3.21E-06               |

| <b>Haloacetamides</b> |                        |
|-----------------------|------------------------|
| <b>Compound</b>       | <b>LC<sub>50</sub></b> |
| TCAM                  | 2.05E-04               |
| DCAM                  | 1.92E-05               |
| DBAM                  | 1.22E-05               |
| BCAM                  | 1.71E-05               |
| CAM                   | 1.48E-04               |
| BAM                   | 1.89E-06               |

| <b>Haloacetic Acids</b> |                        |
|-------------------------|------------------------|
| <b>Compound</b>         | <b>LC<sub>50</sub></b> |
| TCAA                    | 2.40E-04               |
| DCAA                    | 7.30E-05               |
| DBAA                    | 5.90E-04               |
| BCAA                    | 7.78E-04               |
| CAA                     | 8.10E-04               |
| BAA                     | 9.60E-06               |

| <b>Trihalomethanes</b> |                        |
|------------------------|------------------------|
| <b>Compound</b>        | <b>LC<sub>50</sub></b> |
| Chloroform             | 9.62E-04               |

Table SI-3: Tabulated DBP concentrations for all species measured in finished drinking water.

| <b>pH 6</b>   |                      |      |      |      |      |      |
|---------------|----------------------|------|------|------|------|------|
| Time (hour)   | 1                    | 16   | 24   | 30   | 48   | 120  |
| Compound      | Concentration (µg/L) |      |      |      |      |      |
| Chloroform    | 27.7                 | 34.7 | 37.2 | 41.0 | 46.4 | 50.9 |
| BDCM          | 5.8                  | 6.2  | 6.3  | 6.4  | 6.6  | 6.7  |
| TCAN          | 3.1                  | 4.4  | 4.9  | 5.5  | 6.0  | 6.8  |
| DCAN          | 1.0                  | 0.8  | 0.9  | 0.5  | BDL  | BDL  |
| 1,1-DCA       | BDL                  | 0.6  | 0.7  | 0.7  | 0.8  | 0.8  |
| BCAN          | 3.7                  | 4.4  | 4.9  | 5.0  | 5.3  | 5.4  |
| DCAM          | 0.6                  | 1.2  | 0.7  | BDL  | BDL  | 1.1  |
| TCAM          | BDL                  | 0.5  | 0.5  | 0.7  | 0.8  | 0.9  |
| MCAA          | 10.7                 | 13.5 | 12.0 | 14.4 | 14.9 | 15.7 |
| BCAA          | 12.1                 | 18.4 | 18.5 | 23.8 | 30.3 | 31.9 |
| DBAA          | 1.2                  | 1.5  | 1.5  | 1.7  | 2.0  | 1.8  |
| BDCAA         | 16.3                 | 24.9 | 24.0 | 29.9 | 39.1 | 35.1 |
| TBAA          | 3.1                  | 3.9  | 3.9  | 4.1  | 4.9  | 4.4  |
|               |                      |      |      |      |      |      |
|               |                      |      |      |      |      |      |
| <b>pH 7.5</b> |                      |      |      |      |      |      |
| Time (hour)   | 1                    | 16   | 24   | 30   | 48   | 120  |
| Compound      | Concentration (µg/L) |      |      |      |      |      |
| Chloroform    | 28.9                 | 42.9 | 48.6 | 56.2 | 73.2 | 71.6 |
| BDCM          | 6.0                  | 6.9  | 7.2  | 7.4  | 8.5  | 8.0  |
| TCAN          | 3.4                  | 4.8  | 5.1  | 5.7  | 7.3  | 5.8  |
| DCAN          | 0.7                  | 0.5  | 0.6  | 0.5  | 0.5  | BDL  |
| 1,1-DCA       | 0.6                  | 0.7  | 0.8  | 0.8  | 1.1  | 0.9  |
| BCAN          | 4.1                  | 4.4  | 4.0  | 2.9  | 2.3  | 1.0  |
| DCAM          | 1.1                  | 1.4  | 1.6  | 2.2  | 2.9  | 3.1  |
| TCAM          | 0.5                  | 0.7  | 0.8  | 1.0  | 1.4  | 1.1  |
| MCAA          | 11.4                 | 17.3 | 17.8 | 20.2 | 20.1 | 22.1 |
| BCAA          | 13.3                 | 18.3 | 21.2 | 27.2 | 30.6 | 34.3 |
| DBAA          | 1.3                  | 1.5  | 1.7  | 2.1  | 2.0  | 2.1  |
| BDCAA         | 19.8                 | 26.7 | 30.3 | 34.9 | 38.2 | 38.6 |
| TBAA          | 3.7                  | 3.9  | 4.2  | 4.7  | 4.7  | 4.5  |
|               |                      |      |      |      |      |      |
|               |                      |      |      |      |      |      |
| <b>pH 9</b>   |                      |      |      |      |      |      |
| Time (hour)   | 1                    | 16   | 24   | 30   | 48   | 72   |
| Compound      | Concentration (µg/L) |      |      |      |      |      |
| Chloroform    | 35.1                 | 53.5 | 59.8 | 62.2 | 68.2 | 75.2 |
| BDCM          | 6.5                  | 7.6  | 8.0  | 8.2  | 8.4  | 8.9  |
| TCAN          | 3.6                  | 3.5  | 3.0  | 2.7  | 1.9  | 1.3  |
| DCAN          | 0.6                  | 0.5  | 0.6  | 0.6  | BDL  | BDL  |
| 1,1-DCA       | 0.6                  | 0.8  | 0.9  | 0.9  | 1.0  | 1.0  |
| BCAN          | 3.9                  | 0.8  | BDL  | BDL  | BDL  | BDL  |
| DCAM          | 1.5                  | 3.2  | 3.9  | 4.6  | 5.7  | 7.1  |
| TCAM          | 0.7                  | 1.0  | 0.8  | 1.0  | 1.1  | 1.2  |
| MCAA          | 14.1                 | 19.1 | 21.7 | 19.5 | 24.8 | 25.3 |
| BCAA          | 14.9                 | 19.5 | 22.6 | 21.9 | 26.7 | 30.0 |
| DBAA          | 1.3                  | 1.7  | 1.8  | 1.9  | 2.0  | 2.2  |
| BDCAA         | 22.3                 | 24.6 | 28.5 | 23.5 | 30.2 | 31.9 |
| TBAA          | 3.5                  | 3.7  | 3.7  | 2.7  | 3.6  | 3.8  |

Table SI-4: Tabulated DBP concentrations for all species measured in Suwanee River NOM.

| <b>pH 6</b>   |                      |       |       |       |       |       |
|---------------|----------------------|-------|-------|-------|-------|-------|
| Time (hour)   | 1                    | 16    | 24    | 30    | 48    | 120   |
| CPD           | Concentration (µg/L) |       |       |       |       |       |
| Chloroform    | 18.9                 | 56.0  | 67.4  | 76.7  | 86.3  | 120.4 |
| BDCM          | BDL                  | 4.1   | 4.1   | 4.1   | 4.2   | 4.2   |
| TCAN          | 0.8                  | 3.6   | 4.2   | 4.8   | 5.6   | 7.3   |
| DCAN          | 0.9                  | 1.1   | 1.0   | 0.9   | 1.0   | 0.5   |
| 1,1-DCA       | BDL                  | BDL   | BDL   | BDL   | BDL   | BDL   |
| BCAN          | 3.0                  | 6.0   | 6.8   | 7.5   | 8.0   | 9.3   |
| DCAM          | 3.4                  | 3.5   | 3.9   | 3.9   | 3.9   | 3.8   |
| TCAM          | BDL                  | BDL   | BDL   | 0.6   | 0.5   | 0.6   |
| MCAA          | BDL                  | BDL   | BDL   | BDL   | BDL   | BDL   |
| BCAA          | 16.0                 | 41.0  | 46.8  | 51.3  | 57.0  | 73.6  |
| DBAA          | BDL                  | BDL   | BDL   | BDL   | BDL   | BDL   |
| BDCAA         | 22.2                 | 80.0  | 97.8  | 109.1 | 124.2 | 154.8 |
| TBAA          | BDL                  | 2.5   | 2.6   | 2.5   | BDL   | 2.7   |
|               |                      |       |       |       |       |       |
| <b>pH 7.5</b> |                      |       |       |       |       |       |
| Time (hour)   | 1                    | 16    | 24    | 30    | 48    | 120   |
| CPD           | Concentration (µg/L) |       |       |       |       |       |
| Chloroform    | 32.1                 | 95.8  | 108.9 | 117.6 | 137.2 | 147.0 |
| BDCM          | 4.4                  | 4.2   | 4.2   | 4.2   | 4.3   | 4.3   |
| TCAN          | 1.3                  | 4.4   | 4.9   | 5.9   | 5.9   | 7.4   |
| DCAN          | BDL                  | 0.8   | 0.7   | 0.9   | 0.6   | BDL   |
| 1,1-DCA       | BDL                  | BDL   | BDL   | BDL   | BDL   | BDL   |
| BCAN          | 3.9                  | 5.8   | 5.2   | 4.9   | 4.2   | 2.2   |
| DCAM          | 1.6                  | 2.2   | 2.6   | 2.8   | 2.8   | 1.3   |
| TCAM          | BDL                  | BDL   | 0.5   | 0.6   | 0.6   | 0.8   |
| MCAA          | BDL                  | BDL   | BDL   | BDL   | BDL   | 1.3   |
| BCAA          | 18.5                 | 46.0  | 52.2  | 56.8  | 62.8  | 79.5  |
| DBAA          | BDL                  | BDL   | BDL   | BDL   | BDL   | BDL   |
| BDCAA         | 29.7                 | 101.1 | 114.3 | 125.1 | 137.1 | 160.4 |
| TBAA          | BDL                  | 2.2   | 1.8   | 2.2   | 2.2   | 2.3   |
|               |                      |       |       |       |       |       |
| <b>pH 9</b>   |                      |       |       |       |       |       |
| Time (hour)   | 1                    | 16    | 24    | 30    | 48    | 72    |
| CPD           | Concentration (µg/L) |       |       |       |       |       |
| Chloroform    | 35.9                 | 113.5 | 143.6 | 152.3 | 168.4 | 192.7 |
| BDCM          | BDL                  | 4.2   | 4.2   | 4.2   | 4.4   | 4.3   |
| TCAN          | 1.5                  | 2.4   | 2.1   | 1.9   | 1.6   | 1.2   |
| DCAN          | 0.8                  | 0.8   | 0.8   | 0.8   | 0.7   | 0.5   |
| 1,1-DCA       | BDL                  | BDL   | BDL   | BDL   | BDL   | BDL   |
| BCAN          | 3.2                  | 0.7   | BDL   | BDL   | BDL   | BDL   |
| DCAM          | 0.5                  | 1.2   | 0.7   | 1.4   | 1.5   | 2.7   |
| TCAM          | BDL                  | BDL   | BDL   | BDL   | 0.6   | 0.7   |
| MCAA          | BDL                  | BDL   | BDL   | BDL   | 1.6   | 1.1   |
| BCAA          | 19.9                 | 49.1  | 56.2  | 61.1  | 66.3  | 72.6  |
| DBAA          | BDL                  | BDL   | BDL   | BDL   | BDL   | BDL   |
| BDCAA         | 18.2                 | 53.9  | 60.4  | 65.2  | 68.8  | 73.4  |
| TBAA          | BDL                  | BDL   | BDL   | BDL   | BDL   | BDL   |

Table SI-5: Tabulated DBP concentrations for all species measured in Upper Mississippi River NOM.

| <b>pH 6</b>   |                      |      |      |      |       |       |
|---------------|----------------------|------|------|------|-------|-------|
| Time (hour)   | 1                    | 16   | 24   | 30   | 48    | 120   |
| Compound      | Concentration (µg/L) |      |      |      |       |       |
| Chloroform    | 14.3                 | 36.5 | 43.8 | 47.1 | 57.4  | 78.9  |
| BDCM          | 3.9                  | 4.2  | 4.2  | 4.2  | 4.3   | 4.3   |
| TCAN          | 1.3                  | 5.0  | 6.0  | 6.3  | 7.6   | 10.4  |
| DCAN          | 1.0                  | 1.0  | 1.0  | 0.9  | 0.7   | 0.5   |
| 1,1-DCA       | BDL                  | BDL  | BDL  | BDL  | BDL   | BDL   |
| BCAN          | 2.2                  | 4.6  | 5.2  | 5.3  | 6.0   | 7.6   |
| DCAM          | BDL                  | 5.3  | 4.5  | 4.3  | 4.7   | 4.1   |
| TCAM          | BDL                  | 0.7  | 0.8  | 0.8  | 0.9   | 1.3   |
| MCAA          | BDL                  | BDL  | BDL  | BDL  | BDL   | BDL   |
| BCAA          | 10.4                 | 28.6 | 27.6 | 34.9 | 33.3  | 40.4  |
| DBAA          | BDL                  | BDL  | BDL  | BDL  | BDL   | BDL   |
| BDCAA         | 10.9                 | 44.0 | 44.9 | 58.4 | 57.6  | 70.3  |
| TBAA          | BDL                  | BDL  | BDL  | BDL  | BDL   | 2.3   |
| <b>pH 7.5</b> |                      |      |      |      |       |       |
| Time (hour)   | 1                    | 16   | 24   | 30   | 48    | 120   |
| Compound      | Concentration (µg/L) |      |      |      |       |       |
| Chloroform    | 19.3                 | 57.8 | 70.9 | 72.1 | 81.3  | 105.6 |
| BDCM          | 3.9                  | 4.3  | 4.4  | 4.4  | 4.4   | 4.5   |
| TCAN          | 1.9                  | 6.4  | 7.3  | 7.5  | 8.2   | 8.7   |
| DCAN          | 1.3                  | 0.8  | 0.8  | 0.7  | 0.7   | BDL   |
| 1,1-DCA       | BDL                  | BDL  | BDL  | BDL  | BDL   | 0.5   |
| BCAN          | 2.8                  | 4.3  | 3.9  | 3.9  | 3.3   | 1.6   |
| DCAM          | 1.3                  | 2.0  | 1.8  | 2.2  | 2.9   | 4.2   |
| TCAM          | BDL                  | 1.0  | 1.0  | 1.2  | 1.4   | 1.8   |
| MCAA          | BDL                  | 1.2  | 1.6  | 1.7  | 2.0   | 2.4   |
| BCAA          | 10.5                 | 33.3 | 37.7 | 39.6 | 45.5  | 64.1  |
| DBAA          | BDL                  | BDL  | BDL  | BDL  | BDL   | BDL   |
| BDCAA         | 12.7                 | 56.8 | 66.7 | 69.7 | 79.8  | 105.0 |
| TBAA          | BDL                  | BDL  | 2.0  | 2.0  | 2.1   | BDL   |
| <b>pH 9</b>   |                      |      |      |      |       |       |
| Time (hour)   | 1                    | 16   | 24   | 30   | 48    | 72    |
| Compound      | Concentration (µg/L) |      |      |      |       |       |
| Chloroform    | 25.3                 | 78.7 | 85.8 | 93.3 | 107.4 | 119.2 |
| BDCM          | 4.1                  | 4.4  | 4.4  | 4.4  | 4.5   | 4.6   |
| TCAN          | 2.1                  | 3.1  | 2.5  | 2.3  | 1.6   | 1.3   |
| DCAN          | 1.2                  | 0.8  | 0.9  | 0.8  | 0.7   | 0.6   |
| 1,1-DCA       | BDL                  | BDL  | BDL  | BDL  | BDL   | BDL   |
| BCAN          | 2.7                  | 0.5  | BDL  | BDL  | BDL   | BDL   |
| DCAM          | BDL                  | 4.0  | 5.7  | 6.1  | 8.6   | 9.4   |
| TCAM          | BDL                  | 0.8  | 0.9  | 1.0  | 1.3   | 1.4   |
| MCAA          | BDL                  | 1.7  | 1.9  | 2.0  | 3.0   | 3.6   |
| BCAA          | 14.0                 | 34.8 | 37.2 | 41.3 | 45.6  | 51.1  |
| DBAA          | BDL                  | BDL  | BDL  | BDL  | BDL   | BDL   |
| BDCAA         | 14.5                 | 35.6 | 37.0 | 40.4 | 44.1  | 47.5  |
| TBAA          | BDL                  | BDL  | BDL  | BDL  | BDL   | BDL   |

Table SI-6: Pearson coefficients for linear best fits between pH and DBPs in finished drinking water. 1- and 24-hour experiments were conducted in triplicate, with the average concentration shown below. Other correlations are based on only 3 data points but confirm trends apparent in the replicated experiments.

| <b>1-hour</b>    | Concentration (µg/L) |             |             |             |
|------------------|----------------------|-------------|-------------|-------------|
| pH               | THM                  | HAA         | HAM         | HAN         |
| 6                | 33.52                | 43.36       | 0.95        | 7.77        |
| 7.5              | 34.88                | 49.39       | 1.57        | 8.23        |
| 9                | 41.61                | 56.14       | 2.22        | 8.15        |
| <b>Pearson R</b> | <b>0.91</b>          | <b>0.98</b> | <b>0.85</b> | <b>0.54</b> |

| <b>16-hour</b>   | Concentration (µg/L) |             |             |              |
|------------------|----------------------|-------------|-------------|--------------|
| pH               | THM                  | HAA         | HAM         | HAN          |
| 6                | 40.87                | 62.21       | 1.70        | 9.57         |
| 7.5              | 49.86                | 67.79       | 2.14        | 9.69         |
| 9                | 61.16                | 68.56       | 4.14        | 4.83         |
| <b>Pearson R</b> | <b>1.00</b>          | <b>0.92</b> | <b>0.94</b> | <b>-0.85</b> |

| <b>24-hour</b>   | Concentration (µg/L) |             |             |              |
|------------------|----------------------|-------------|-------------|--------------|
| pH               | THM                  | HAA         | HAM         | HAN          |
| 6                | 43.59                | 59.96       | 1.27        | 10.61        |
| 7.5              | 55.77                | 75.14       | 2.42        | 9.75         |
| 9                | 67.79                | 78.27       | 4.74        | 3.86         |
| <b>Pearson R</b> | <b>0.99</b>          | <b>0.87</b> | <b>0.97</b> | <b>-0.93</b> |

| <b>30-hour</b>   | Concentration (µg/L) |              |             |              |
|------------------|----------------------|--------------|-------------|--------------|
| pH               | THM                  | HAA          | HAM         | HAN          |
| 6                | 47.35                | 73.86        | 1.21        | 11.07        |
| 7.5              | 63.66                | 89.16        | 3.20        | 9.09         |
| 9                | 70.34                | 69.62        | 5.60        | 3.49         |
| <b>Pearson R</b> | <b>0.97</b>          | <b>-0.21</b> | <b>1.00</b> | <b>-0.96</b> |

| <b>48-hour</b>   | Concentration (µg/L) |              |             |              |
|------------------|----------------------|--------------|-------------|--------------|
| pH               | THM                  | HAA          | HAM         | HAN          |
| 6                | 52.98                | 91.18        | 1.25        | 11.79        |
| 7.5              | 81.70                | 95.65        | 4.30        | 10.15        |
| 9                | 76.65                | 87.32        | 6.83        | 2.63         |
| <b>Pearson R</b> | <b>0.77</b>          | <b>-0.46</b> | <b>1.00</b> | <b>-0.94</b> |



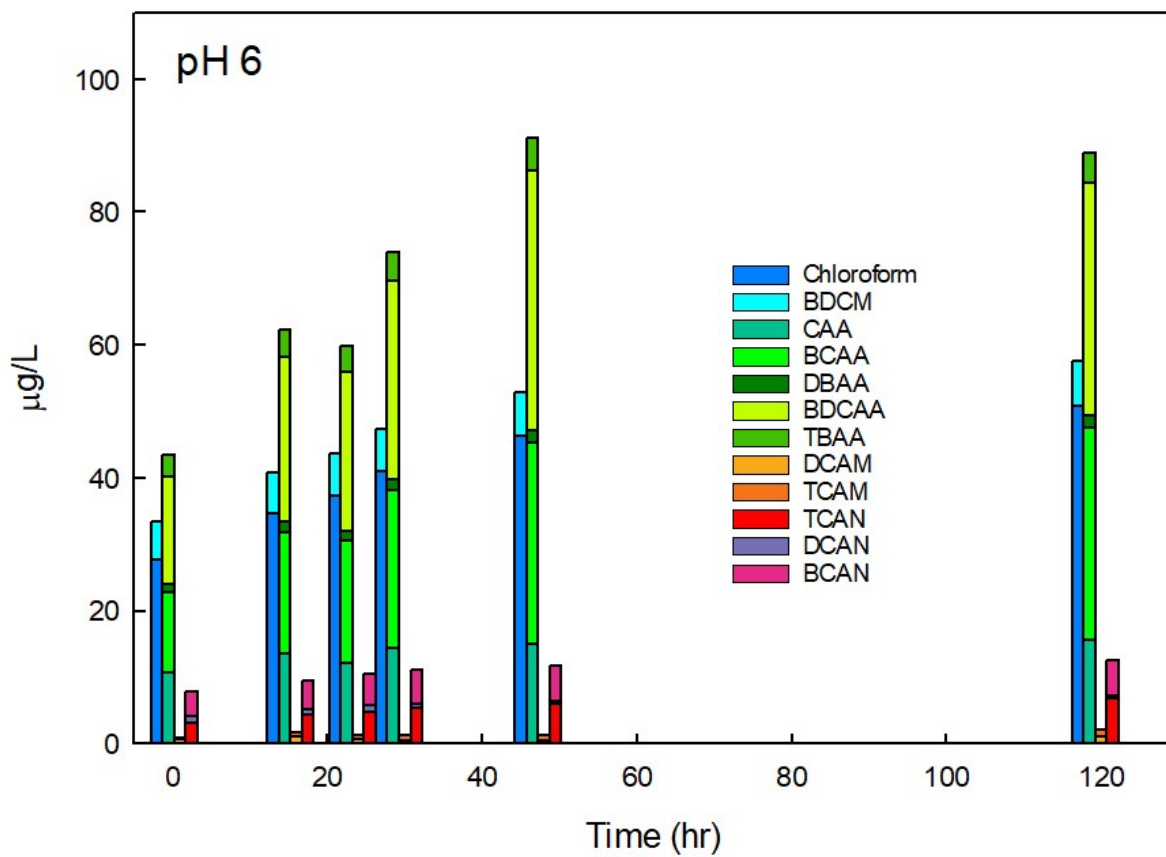

Figure SI-1: DBPs in finished drinking water at pH 6 stacked by common functional group.

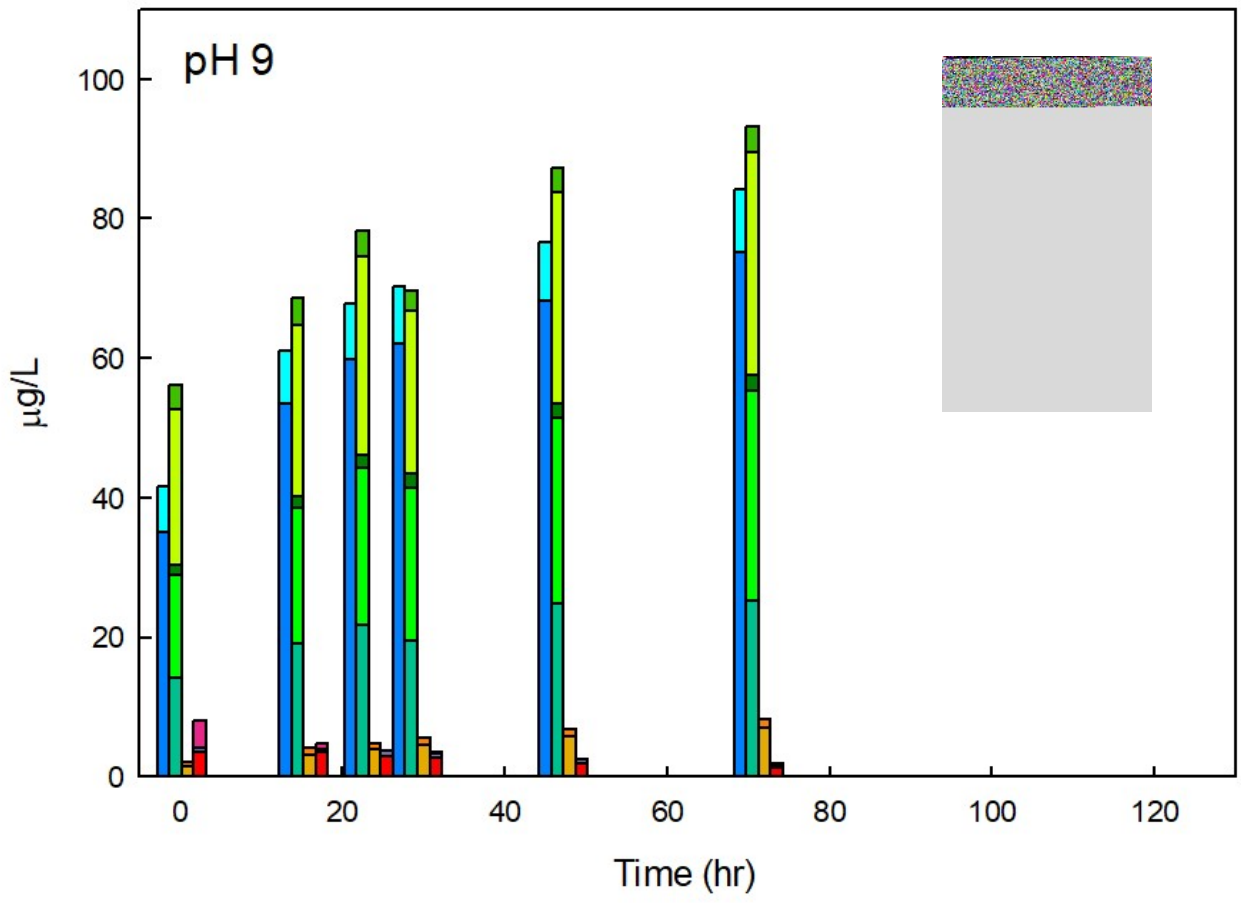

Figure SI-2: DBPs in finished drinking water at pH 9 stacked by common functional group.

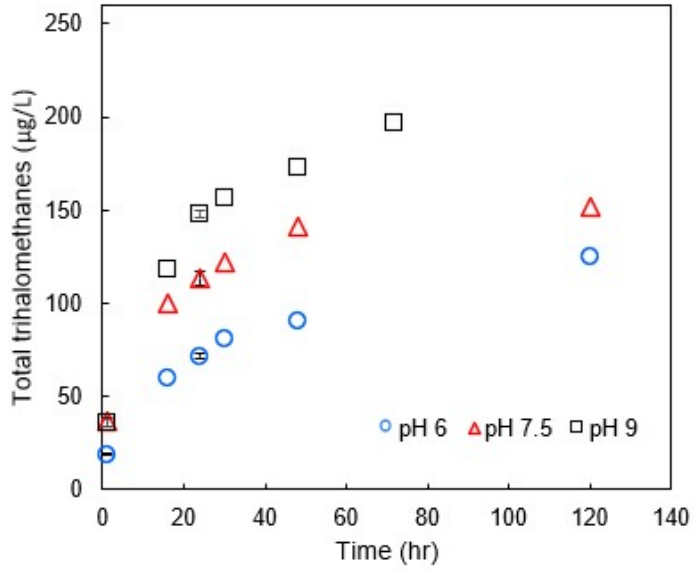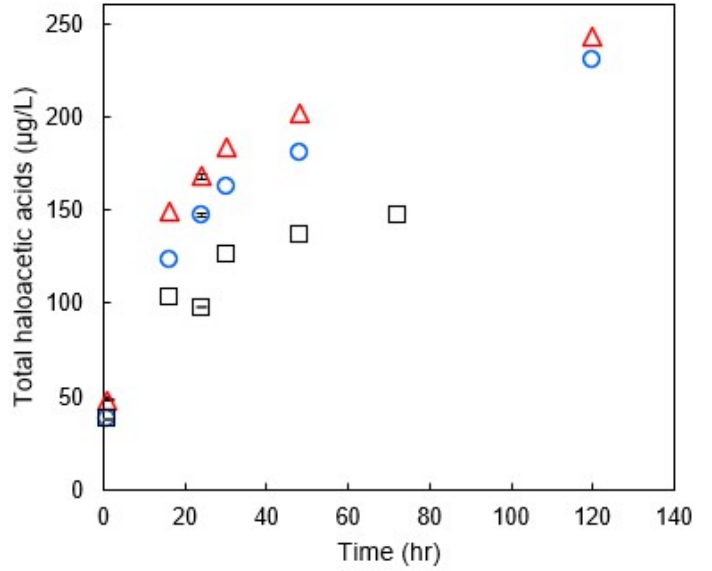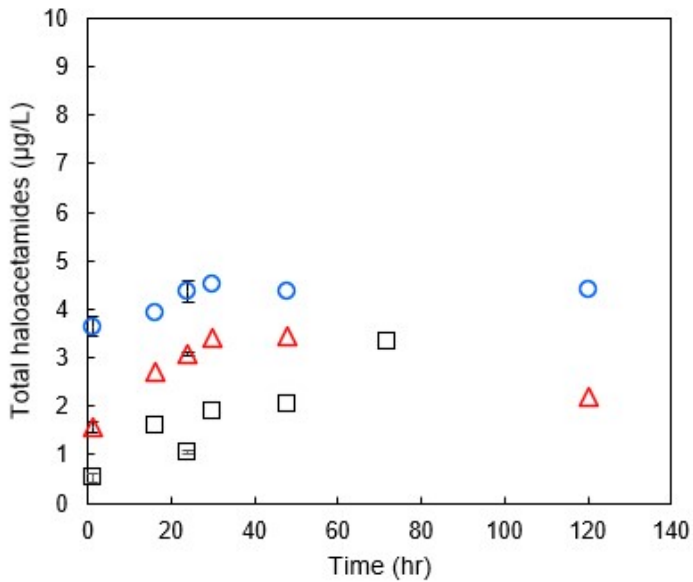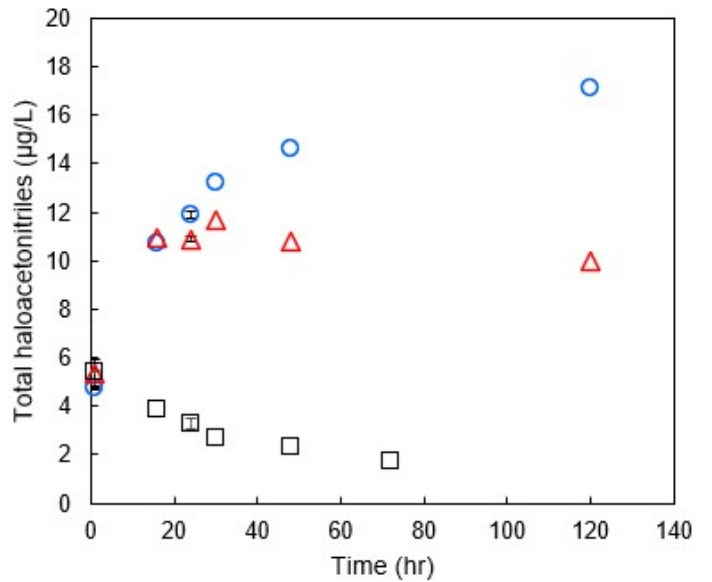

Figure SI-3: DBP formation over time by class at pH 6, 7.5, and 9 for Suwannee River NOM.

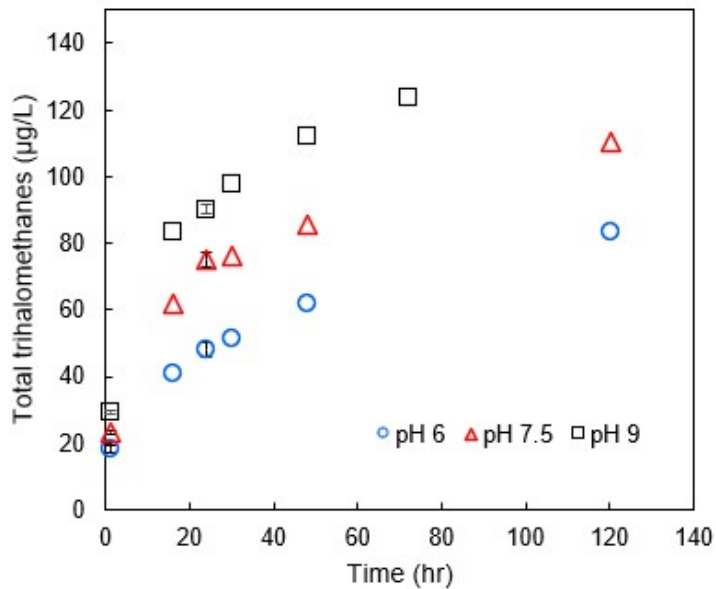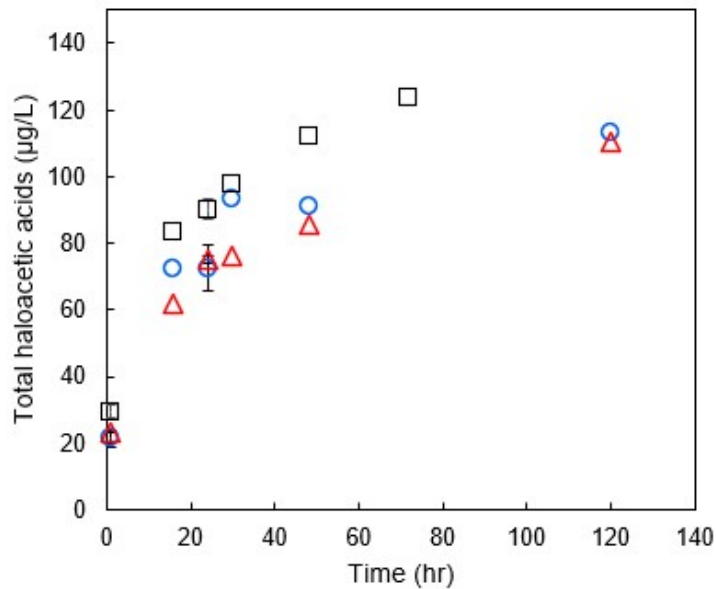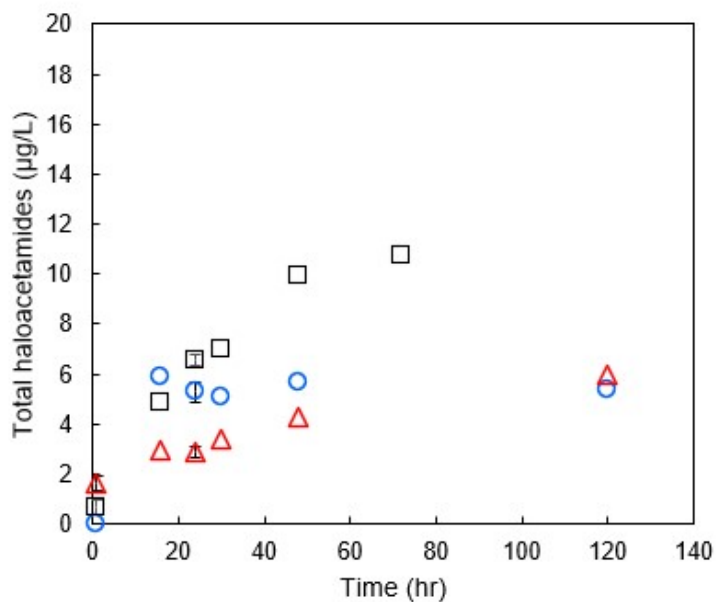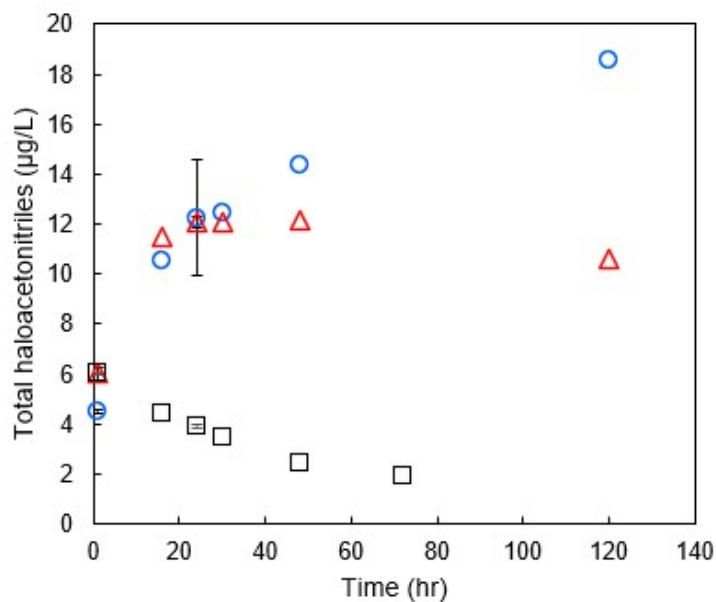

Figure SI-4: DBP formation over time by class at pH 6, 7.5, and 9 for Upper Mississippi River NOM.

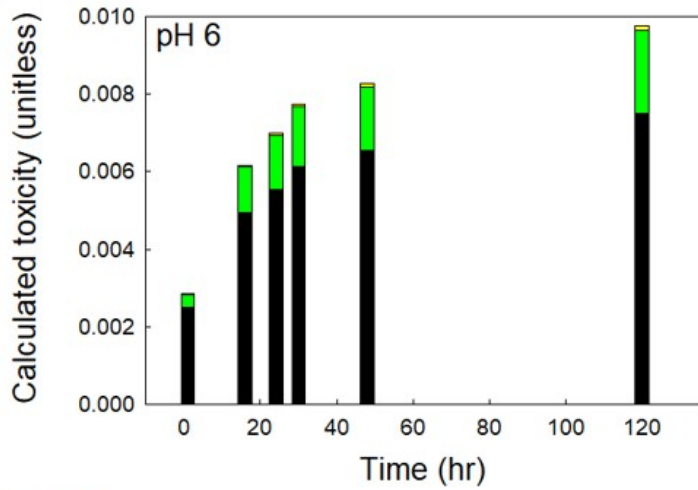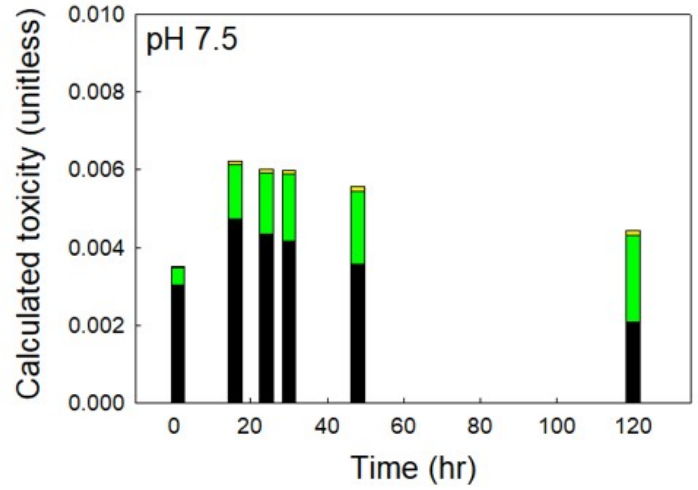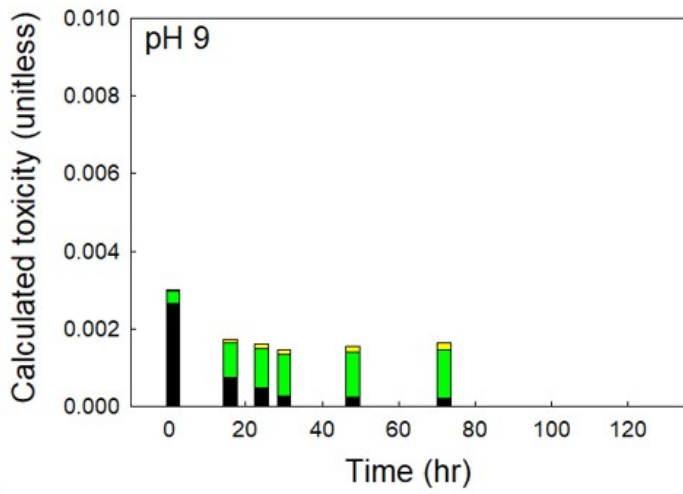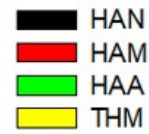

Figure SI-5: Toxicity contribution of each DBP class for Suwannee River NOM at pH 6, 7.5, and 9.

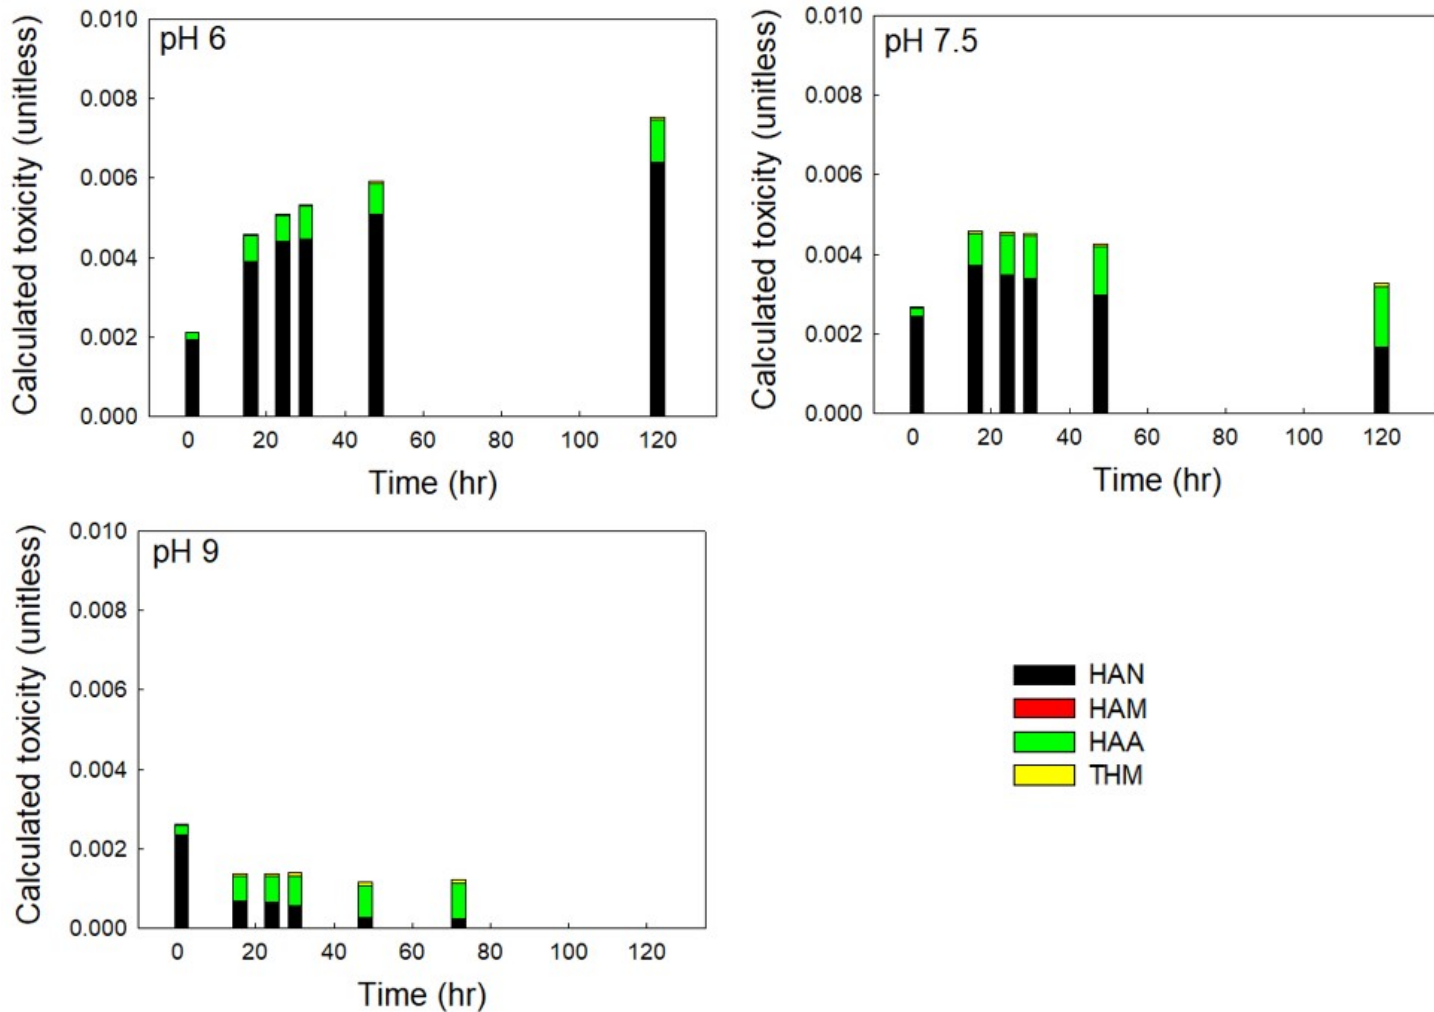

Figure SI-6: Toxicity contribution of each DBP class for Upper Mississippi River NOM at pH 6, 7.5, and 9.
